# Supplementary material
Source: PubMed Central journal article supplement (PMC7659531)
Supplement: mmc1.pdf [file mmc1.pdf]

**Cell Reports Medicine, Volume 1**

**Supplemental Information**

**Neutralizing Antibodies Protect against  
Oral Transmission of Lymphocryptovirus**

**Swati Singh, Leah J. Homad, Nicholas R. Akins, Claire M. Stoffers, Stefan Lackhar, Harman Malhi, Yu-Hsin Wan, David J. Rawlings, and Andrew T. McGuire**

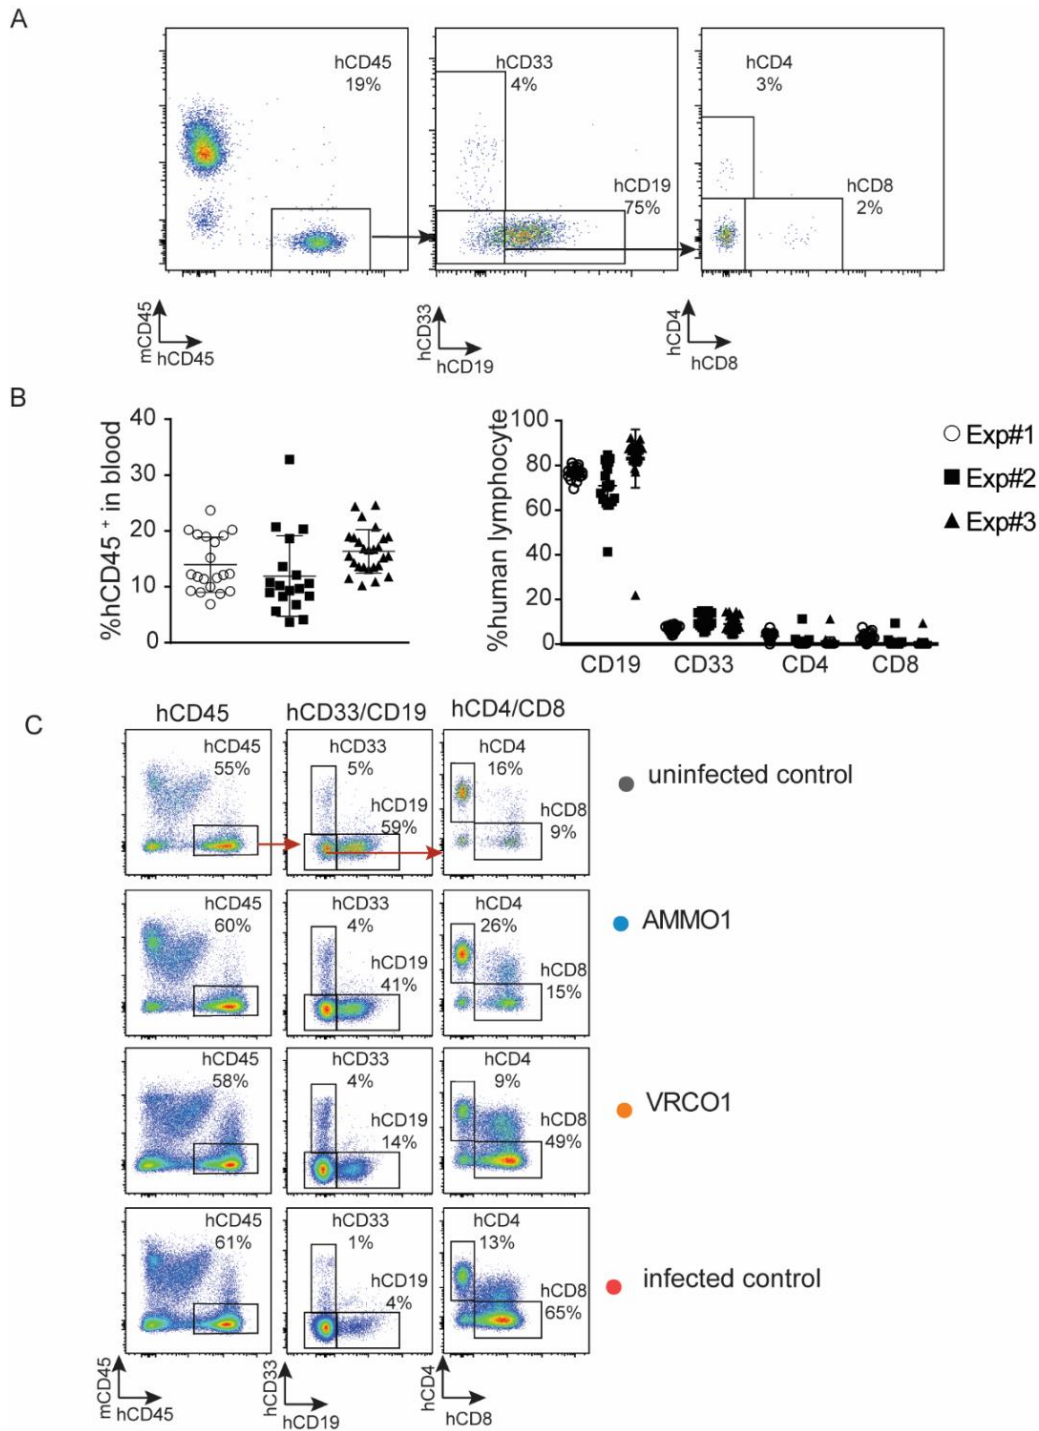

**Figure S1. Human cell engraftment in NSG recipient mice prior to EBV infection, related to Figure 1.** The frequency of human-derived cells in peripheral blood mononuclear cells from NSG mice were measured 12-14 weeks following HSC engraftment but prior to viral challenge. (A) Representative flow plot showing the gating strategy used to analyze peripheral blood and splenocytes. (B) Frequency of human (h) hCD45<sup>+</sup> (left) and, hCD45<sup>+</sup>hCD19<sup>+</sup>hCD45<sup>+</sup>hCD33<sup>+</sup>, hCD45<sup>+</sup>hCD4<sup>+</sup> and hCD45<sup>+</sup>hCD8<sup>+</sup> cells (right) from 3 independent experiments. (C) Representative flow plot showing the gating and frequency of hCD45<sup>+</sup> hCD19<sup>+</sup>, hCD45<sup>+</sup>hCD33<sup>+</sup>, hCD45<sup>+</sup>hCD4<sup>+</sup> and hCD45<sup>+</sup>hCD8<sup>+</sup> cells in the peripheral blood of mice from the indicated groups following viral challenge.

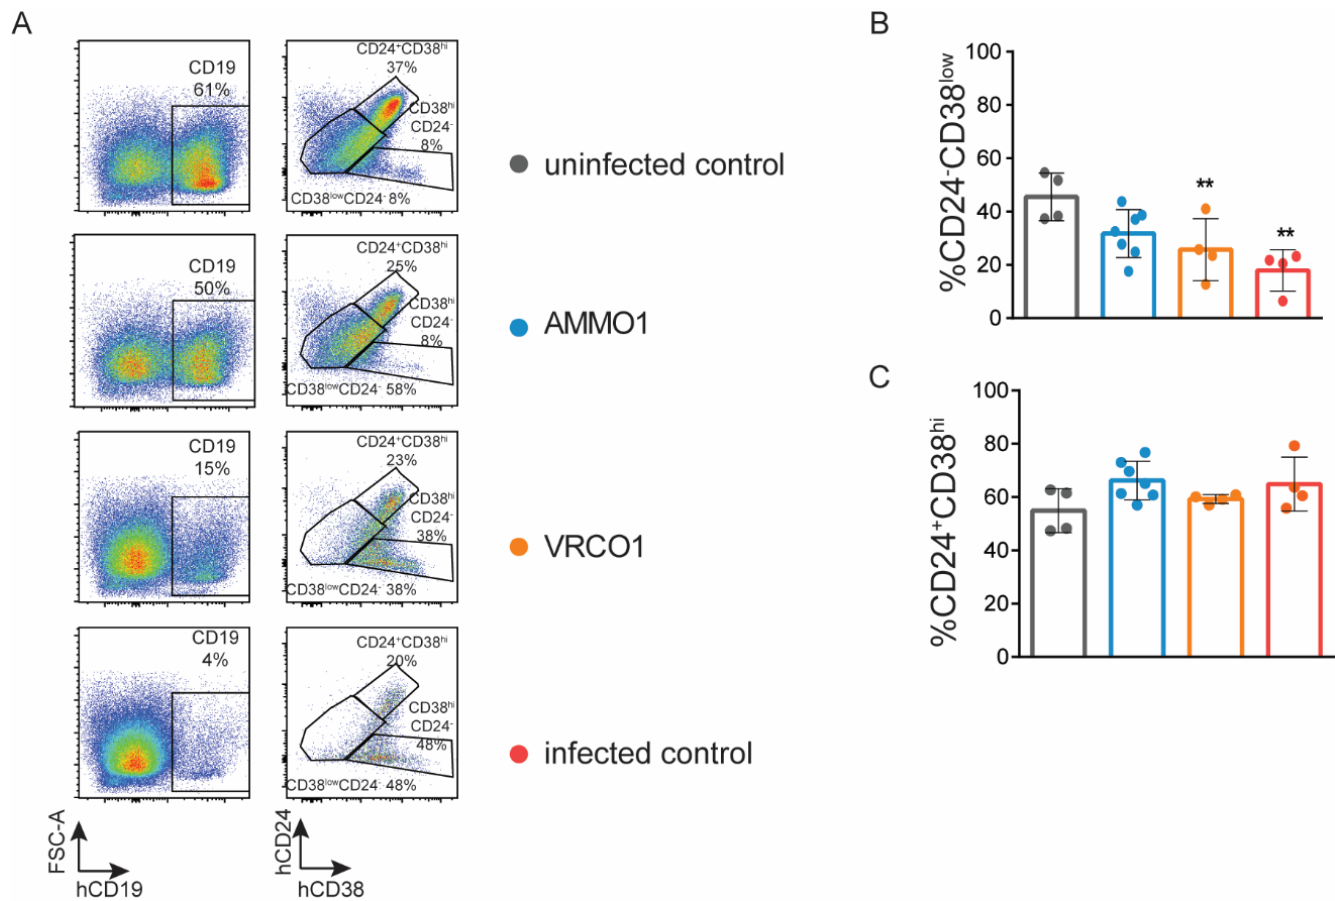

**Figure S2. Human B cell phenotype in humanized mice following viral challenge, related to Figure 1. (A)** Representative flow plot showing the staining and gating strategy to identify B cell subsets in splenocytes based upon staining with hCD19, hCD38 and hCD24 (pre-gated on the mCD45<sup>+</sup>hCD45<sup>+</sup> human cell population). Frequency of **(B)** hCD45<sup>+</sup>hCD19<sup>+</sup>hCD24<sup>+</sup>hCD38<sup>low</sup> and **(C)** hCD45<sup>+</sup>hCD19<sup>+</sup>hCD24<sup>+</sup>hCD38<sup>hi</sup> cells from the animals from Figure 1. Viral infection is associated with a decrease in the overall proportion of hCD19<sup>+</sup> cells and a greater proportion of hCD45<sup>+</sup>hCD19<sup>+</sup>hCD24<sup>+</sup>hCD38<sup>hi</sup> cells. The frequency of hCD45<sup>+</sup>hCD19<sup>+</sup>hCD24<sup>+</sup>hCD38<sup>hi</sup> cells is shown in Figure 1K. Asterisks represent groups that are statistically different from the uninfected controls determined by One Way ANOVA, Sidak multiple comparisons test \*\*,  $p \leq 0.002$ .

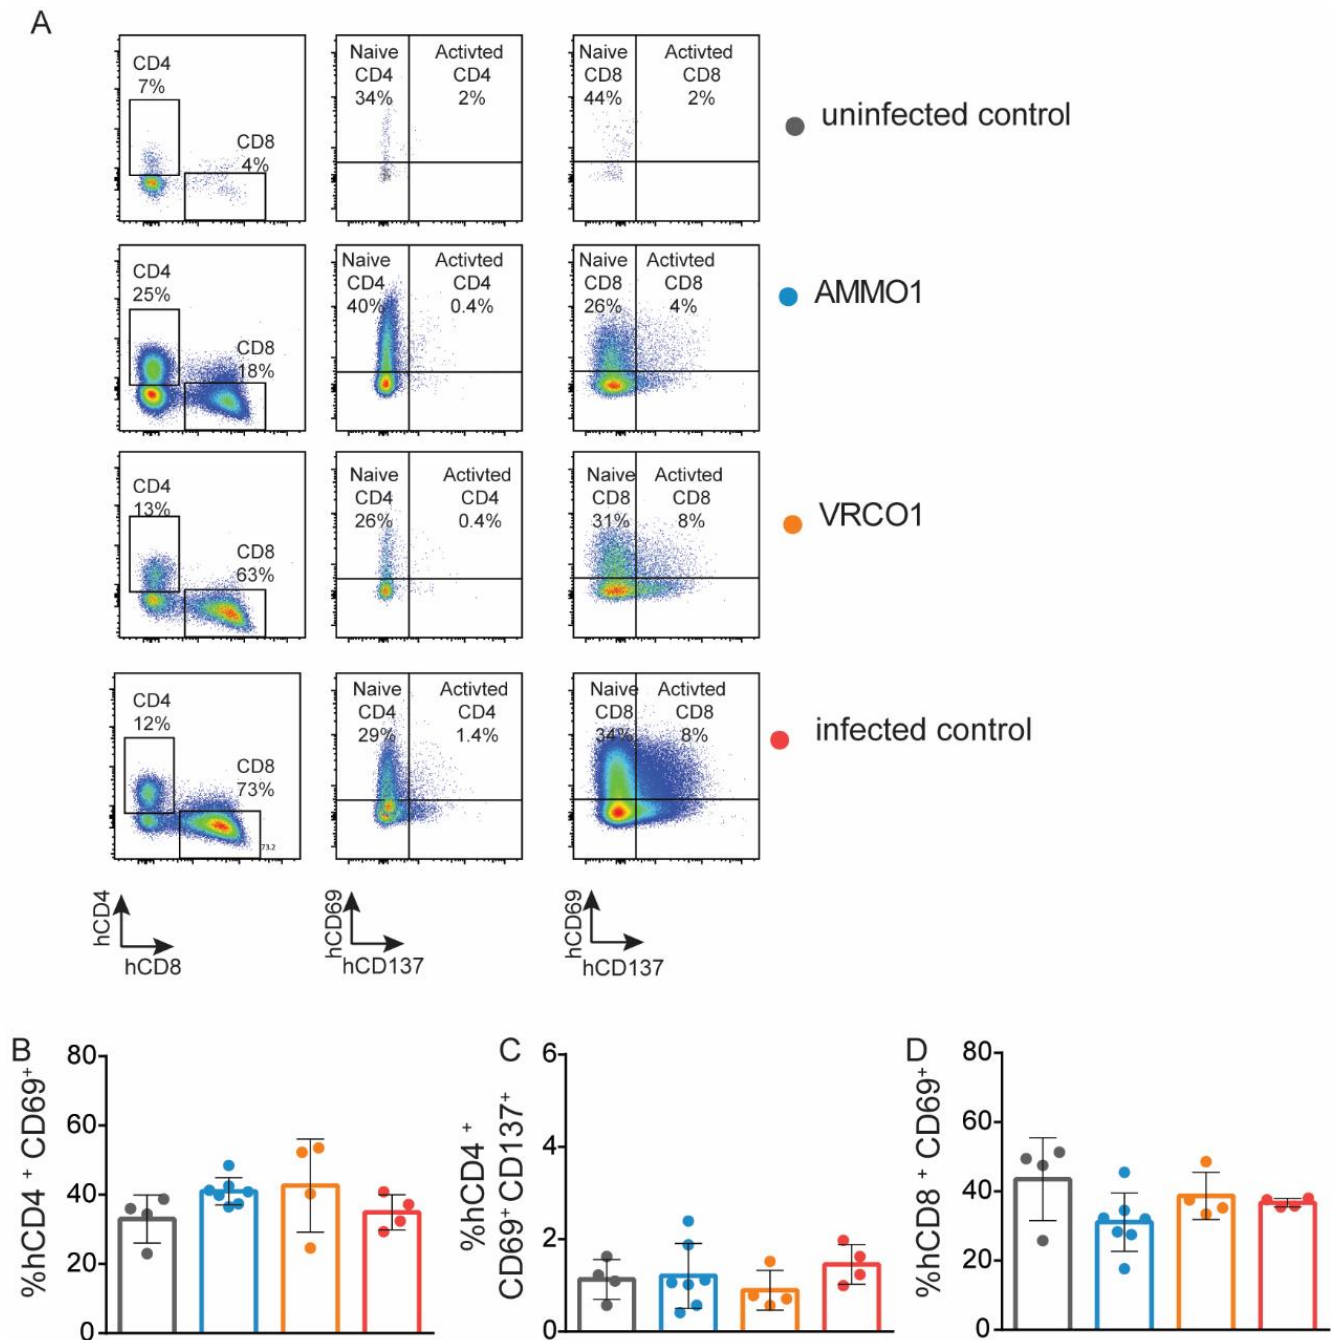

**Figure S3. Splenic T cell phenotype in humanized mice following viral challenge, related to Figure 1. (A)** Representative flow plot showing the staining and gating strategy of hCD4<sup>+</sup>, hCD8<sup>+</sup>, hCD69<sup>+</sup> and hCD137<sup>+</sup> T cells at necropsy (pre-gated on engrafted human cells based upon mCD45<sup>+</sup>hCD45<sup>+</sup> staining). Frequency of **(B)** naïve hCD45<sup>+</sup>hCD69<sup>+</sup>hCD137<sup>-</sup> and **(C)** activated hCD45<sup>+</sup>hCD69<sup>+</sup>hCD137<sup>+</sup>hCD4<sup>+</sup> T cells, and the frequency of **(D)** naïve hCD45<sup>+</sup>hCD69<sup>+</sup>hCD137<sup>-</sup>hCD8<sup>+</sup> T cells in the splenocytes of the animals from Figure 1. The frequency of activated hCD45<sup>+</sup>hCD69<sup>+</sup>hCD137<sup>+</sup>hCD8<sup>+</sup> T cells is shown in Figure 1M.

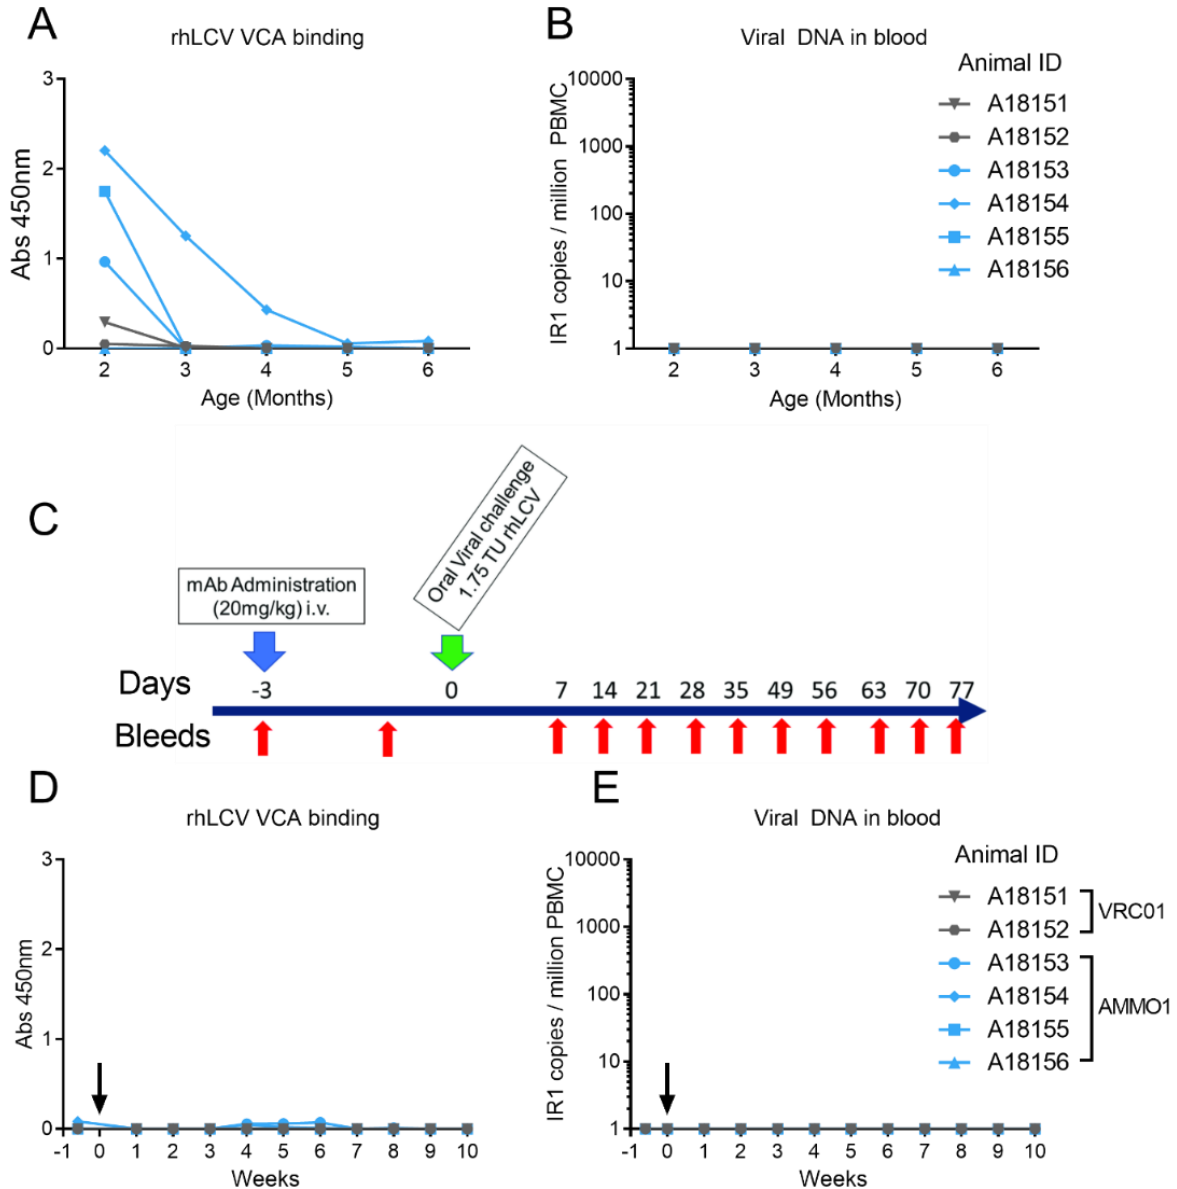

**Figure S4. Monitoring for RhLCV infection in study macaques prior to and following an initial low-dose challenge, related to Figure 4.** Rhesus macaques used in this study were obtained within 24-48 hours of birth. Beginning at 2 months of age, blood was collected monthly. **(A)** Plasma reactivity to pooled peptides derived from the rhesus lymphocryptovirus small viral capsid antigen (rhLCV VCA) was measured by ELISA. **(B)** Viral DNA was quantified in PMBC with a digital droplet PCR assay using primers against the internal repeat region 1 (IR1). Data from macaques that went on to receive infusions of AMMO1 or VRC01 are shown in blue and gray, respectively. **(C)** Timeline of initial challenge study. At ~6 months of age rhesus macaques were infused iv with 20 mg/kg of VRC01 (n=2, gray symbols) or AMMO1 (n=4, blue symbols). Three days later the macaques were challenged orally with 1.75 transforming units of rhLCV. Following challenge, blood was collected weekly for 10 weeks. **(D)** Plasma reactivity to pooled peptides derived from rhLCV VCA was measured by ELISA. **(E)** Viral DNA was quantified in PMBC using a digital droplet PCR assay with primers and probes against the internal repeat region 1 (IR1) of rhLCV. Black arrows indicate the time of viral challenge in **D** and **E**.
